# Supplementary material for: Biophysical Kv3 channel alterations dampen excitability of cortical PV interneurons and contribute to network hyperexcitability in early Alzheimer’s
Source: eLife. 2022 Jun 21;11:e75316. doi: 10.7554/eLife.75316 (PMC9278953; doi:10.7554/eLife.75316)
Supplement: Figure 4—source data 1. [file elife-75316-fig4-data1.xlsx]

## Sheet: Sheet1
Gene symbol	UniprotID	p2	2moFC	logp2mo	2moGene	p3	3moFC	logp3mo	Gene3mo	p6	6moFC	6mologp	Gene6mo	p10	10moFC	10molog2	Gene10mo	p14	14moFC	14mologp	Gene14mo
Kcna1	P16388	0.491925	0.024791	0.308101		0.704102	-0.0242837	0.152365		0.0494147	-0.111647	1.30614	Kcna1	0.572024	0.0311954	0.242586		0.190633	-0.100699	0.719802
Kcna2	P63141	0.90654	0.00395375	0.0426131		0.957065	-0.00231388	0.0190586		0.00624691	-0.129377	2.20433	Kcna2	0.113117	-0.0793332	0.946472		0.0374715	-0.126437	1.4263	Kcna2
Kcna3	P16390	0.189148	-0.0463739	0.723199		0.116381	0.0490809	0.934117		0.994482	-0.00017276	0.00240293		0.360917	-0.0329479	0.442593		0.182921	-0.07947	0.737736
Kcna4	Q61423	0.803196	0.00926302	0.0951785		0.478736	0.051167	0.319904		0.359578	-0.0669123	0.444207		0.482177	0.0473481	0.316794		0.902194	-0.0090974	0.0446999
Kcna5	Q61762	0.461108	-0.135748	0.336197		0.82957	-0.0463301	0.0811472		0.528618	-0.107864	0.276858		0.484694	-0.104192	0.314532		0.341673	-0.275663	0.466389
Kcna6	Q61923	0.473458	-0.0301712	0.324719		0.378576	-0.0243186	0.421847		0.188174	-0.0475962	0.725441		0.947632	0.00266336	0.0233603		0.12406	-0.06803	0.906369
Kcnab1	P63143	0.619911	-0.0179304	0.207671		0.593541	0.0324381	0.226549		0.485429	-0.0326353	0.313875		0.688668	0.0250311	0.16199		0.242825	-0.0594887	0.614707
Kcnab2	A0A571BFX6	0.81571	-0.0193678	0.0884643		0.249311	-0.122194	0.603259		0.238095	0.116292	0.623249		0.627103	0.0436206	0.202661		0.948537	-0.00525825	0.0229457
Kcnab2	P62482	0.263577	0.035505	0.579092		0.644366	0.0143385	0.190867		0.182036	-0.0551566	0.739842		0.696599	0.0145084	0.157017		0.352204	-0.0523395	0.453206
Kcnab3	Q8VD73	0.0718544	0.0891956	1.14355		0.69507	0.0165342	0.157972		0.153982	-0.108521	0.81253		0.0231197	-0.134917	1.63602	Kcnab3	0.161373	-0.134223	0.792169
Kcnb1	Q80X33	0.127039	0.065174	0.896064		0.231579	0.0655139	0.635301		0.121252	0.0712724	0.916312		0.91888	0.00727334	0.0367414		0.488153	-0.0486137	0.311444
Kcnb2	A6H8H5	0.394105	0.0419335	0.404388		0.128795	0.0719484	0.890102		0.293361	0.0396575	0.532597		0.16322	-0.0611947	0.787226		0.776034	-0.0132144	0.110119
Kcnc1	P15388-3	0.641889	-0.0161566	0.19254		0.528211	-0.0237823	0.277192		0.0567191	-0.0850537	1.24627		0.0518181	-0.099863	1.28552		0.0500636	-0.0904399	1.30048	Kcnc1
Kcnc2	Q14B80	0.955006	0.00277951	0.0199937		0.290047	-0.0306042	0.537531		0.548819	0.030646	0.260571		0.155623	-0.0610472	0.807926		0.395762	0.0302538	0.402566
Kcnc3	Q63959	0.494554	-0.0440974	0.305786		0.0387775	-0.166291	1.41142	Kcnc3	0.0765995	-0.175264	1.11577		0.0823949	-0.217954	1.0841		0.00482539	-0.323521	2.31647	Kcnc3
Kcnd1	Q03719	0.0326268	0.0741185	1.48643	Kcnd1	0.696385	0.0160117	0.157151		0.400033	0.0409646	0.397905		0.313839	0.0381963	0.503294		0.62394	-0.0131011	0.204857
Kcnd2	Q9Z0V2	0.168937	0.033364	0.772276		0.677275	0.0131571	0.169235		0.242079	-0.0307442	0.616042		0.116257	-0.0623385	0.934581		0.000249492	-0.137088	3.60294	Kcnd2
Kcnd3	Q9Z0V1	0.225455	0.043661	0.646941		0.186654	-0.0646123	0.728963		0.466326	0.0416773	0.33131		0.0157773	-0.106643	1.80197	Kcnd3	0.146837	-0.074991	0.833164
Kcnh1	A0A1L1M1J8	0.4325	-0.0242292	0.364013		0.178509	0.0425273	0.748341		0.00631988	0.104717	2.19929	Kcnh1	0.322594	0.0607334	0.491343		0.0389792	0.127219	1.40917	Kcnh1
Kcnh2	Q80XE8	0.276854	-0.0815518	0.557749		0.558133	-0.0638713	0.253262		0.00787809	-0.182048	2.10358	Kcnh2	0.745135	-0.035898	0.127765		0.116883	0.153137	0.932247
Kcnh3	Q9WVJ0	0.522782	0.0498941	0.281679		0.532771	0.0699974	0.27346		0.327203	0.09832	0.485183		0.879461	0.0234043	0.0557833		0.220969	0.137494	0.655669
Kcnh5	Q920E3	0.894006	-0.0126451	0.0486595		0.705766	0.0404534	0.15134		0.503325	0.0651123	0.298151		0.165383	0.128738	0.781509		0.910768	0.00869482	0.0405921
Kcnh7	Q9ER47	0.0149484	0.0905534	1.82541	Kcnh7	0.265786	0.0440669	0.575468		0.00827615	0.13294	2.08217	Kcnh7	0.0587744	0.0701328	1.23081		0.215344	0.070463	0.666868
Kcnip1	Q3YAB5	0.571588	0.0182066	0.242917		0.861604	-0.00531056	0.0646921		0.853496	-0.00558933	0.0687987		0.000312217	-0.102873	3.50554	Kcnip1	9.31408e-05	-0.167093	4.03086	Kcnip1
Kcnip2	Q9JJ69	0.973869	0.00173572	0.0114995		0.44999	0.0711709	0.346797		0.947865	-0.00482688	0.0232534		0.0953163	0.256806	1.02083		0.685189	0.0362492	0.16419
Kcnip3	Q9QXT8	0.191756	-0.0569634	0.717252		0.323239	0.0431493	0.490476		0.0027105	0.147719	2.56695	Kcnip3	0.141154	0.0919673	0.850306		0.000165186	0.281268	3.78203	Kcnip3
Kcnip4	Q6PHZ8	0.84154	-0.00566757	0.0749254		0.711384	-0.014949	0.147896		0.00597331	0.0963686	2.22379	Kcnip4	0.0599411	-0.105406	1.22228		0.00279604	-0.11445	2.55346	Kcnip4
Kcnj10	Q8C7Z5	0.255539	-0.122888	0.592543		0.197211	-0.161334	0.70507		0.0709309	-0.223045	1.14916		0.0948904	-0.310365	1.02278		0.885202	-0.0210016	0.0529574
Kcnj11	Q61743	0.146715	0.0719017	0.833524		0.0267308	0.104571	1.57299	Kcnj11	0.937496	0.00420948	0.0280305		0.51067	-0.0388371	0.29186		0.154691	-0.117743	0.810534
Kcnj16	Q9Z307	0.125208	-0.169939	0.902368		0.0410114	-0.219273	1.3871	Kcnj16	0.0102	-0.284113	1.9914	Kcnj16	0.041034	-0.325488	1.38686	Kcnj16	0.110057	-0.269258	0.958382
Kcnj2	P35561	0.149285	-0.132088	0.825984		0.884796	0.0176689	0.0531567		0.829245	-0.031712	0.081317		0.368956	0.130199	0.433026		0.370038	0.12963	0.431753
Kcnj3	P63250	0.0135991	0.146109	1.86649	Kcnj3	0.216328	0.0605527	0.664888		0.135149	0.0807779	0.869187		0.731098	0.0183396	0.136024		0.524932	-0.0525109	0.279897
Kcnj6	Q0VB45	0.247563	0.0549777	0.606314		0.0163873	0.138847	1.78549	Kcnj6	0.0445749	0.122411	1.35091	Kcnj6	0.0318015	0.143877	1.49755	Kcnj6	0.784531	-0.0202666	0.10539
Kcnj9	P48543	0.0493923	0.135936	1.30634	Kcnj9	0.816558	0.0205705	0.0880131		0.00570995	0.263063	2.24337	Kcnj9	0.292263	0.118068	0.534227		0.0600663	0.107087	1.22137
Kcnk1	A0A1D5RMH2	0.322561	0.0347248	0.491388		0.908498	-0.00342872	0.0416758		0.00988934	0.115332	2.00483	Kcnk1	0.243092	0.0498913	0.61423		0.00685243	0.139094	2.16416	Kcnk1
Kcnma1	A0A286YD35	0.169791	-0.0393091	0.770086		0.706825	0.0172892	0.150688		0.0544626	0.0880662	1.2639		0.26846	0.0527464	0.57112		0.952207	-0.00245608	0.0212686
Kcnmb4	Q9JIN6	0.0582118	0.201638	1.23499		0.187055	0.175413	0.72803		0.637854	-0.0485545	0.195279		0.00742049	-0.338422	2.12957	Kcnmb4	0.23846	-0.155769	0.622584
Kcnn2	P58390	0.552267	-0.0166347	0.257851		0.243133	-0.0439351	0.614157		0.711969	0.0134346	0.147539		0.358059	-0.0912749	0.446046		0.664925	0.0345482	0.177227
Kcnn3	P58391	0.808905	0.00746895	0.0921023		0.101874	-0.050489	0.991936		0.786211	0.0135505	0.104461		0.50606	-0.0260064	0.295798		0.0756851	0.0788976	1.12099
Kcnq2	B7ZBV9	0.00280326	0.0622574	2.55234	Kcnq2	0.175698	0.0397768	0.755234		0.0307516	0.0584032	1.51213	Kcnq2	0.00463967	0.161171	2.33351	Kcnq2	0.000125574	0.125939	3.9011	Kcnq2
Kcnq2	B7ZBW1	0.413168	-0.0519107	0.383873		0.467655	-0.036472	0.330074		0.379811	0.101455	0.420433		0.088221	0.12686	1.05443		0.772858	-0.014451	0.1119
Kcnq3	Q8K3F6	0.2528	0.0429844	0.597223		0.290859	0.0662102	0.536317		0.180711	0.0723685	0.743015		0.0226115	0.207563	1.64567	Kcnq3	0.894949	0.00906527	0.0482015
Kcnq5	G3UYG5	0.0853715	0.0997101	1.06869		0.506507	0.0511997	0.295415		0.0414904	0.139326	1.38205	Kcnq5	0.16003	0.136238	0.7958		0.407887	0.0638646	0.389461
Kcnt1	A2AHB7	0.178262	-0.028897	0.748941		0.52484	-0.0201957	0.279973		0.676811	-0.0101395	0.169533		0.254	0.0422093	0.595167		0.383098	-0.0230584	0.41669
Kctd1	Q5M956	0.129037	0.0665051	0.889287		0.282823	0.0940465	0.548486		0.14644	0.0720703	0.834339		0.530222	0.0575152	0.275542		0.618548	0.0446131	0.208626
Kctd10	Q922M3	0.214087	-0.0387855	0.66941		0.429756	0.0277424	0.366778		0.0496727	0.0695634	1.30388	Kctd10	0.385829	-0.0360086	0.413605		0.000950865	0.132051	3.02188	Kctd10
Kctd12	A0A0R4J2B2	0.00117925	-0.0735224	2.92839	Kctd12	0.983322	0.000955412	0.00730437		0.000180409	0.0977156	3.74374	Kctd12	0.023591	0.106162	1.62725	Kctd12	0.00715517	0.105072	2.14538	Kctd12
Kctd12b	Q8C7J6	0.62789	0.0403306	0.202117		0.525594	-0.067191	0.27935		0.231185	-0.123512	0.636041		0.382102	-0.137281	0.41782		0.501939	-0.106119	0.299349
Kctd13	Q8BGV7	0.243275	0.0633455	0.613902		0.122445	-0.0795458	0.912059		0.847867	0.0109702	0.0716724		0.139953	-0.0947031	0.854017		0.0117648	-0.118842	1.92942	Kctd13
Kctd15	Q8K0E1	0.500406	0.0614189	0.300678		0.450128	0.108635	0.346664		0.153233	0.118686	0.814648		0.892104	0.0140667	0.0495844		0.00229841	0.334658	2.63857	Kctd15
Kctd16	Q5DTY9	0.179419	0.0729491	0.746131		0.379506	0.0664064	0.420781		0.495582	0.0407455	0.304885		0.794547	0.016699	0.0998802		0.591329	-0.0459379	0.228171
Kctd17	E0CYQ0	0.40501	0.0390749	0.392534		0.0775063	0.111912	1.11066		0.382332	0.0400074	0.41756		0.975206	0.00214876	0.0109037		0.575651	-0.0472181	0.239841
Kctd2	A2A9V9	0.806635	0.00988603	0.0933231		0.627553	-0.0275501	0.20235		0.549012	0.0289568	0.260418		0.0126305	-0.0883593	1.89858	Kctd2	0.831548	0.0118379	0.0801125
Kctd21	B2RTJ2	0.0268599	-0.069942	1.5709	Kctd21	0.0484938	-0.0696459	1.31431	Kctd21	0.691253	0.0144571	0.160363		0.999345	2.7332e-05	0.000284481		0.305757	-0.0254364	0.514623
Kctd3	Q8BFX3	0.785692	0.00716537	0.104748		0.382432	-0.0333019	0.417446		0.0123572	0.0597793	1.90808	Kctd3	0.216784	0.0235942	0.663973		0.630319	-0.0124325	0.20044
Kctd4	Q9D7X1	0.268629	-0.0464868	0.570847		0.320106	0.0470589	0.494706		0.422089	0.0389878	0.374596		0.386103	0.041125	0.413297		0.726659	0.0171889	0.138669
Kctd5	Q6ZQH5	0.733585	0.0156289	0.13455		0.523772	0.0214639	0.280857		0.0572875	0.0791644	1.24194		0.722698	0.0165416	0.141043		0.0417369	0.0998956	1.37948	Kctd5
Kctd6	Q8BNL5	0.512769	0.0307532	0.290078		0.613613	0.0217581	0.212105		0.570139	0.0469205	0.244019		0.109302	0.176591	0.961372		0.0385951	0.137821	1.41347	Kctd6
Kctd8	Q50H33	0.831217	0.00995769	0.0802857		0.0993958	-0.120944	1.00263		0.00984366	-0.128627	2.00684	Kctd8	0.0551373	-0.144176	1.25855		0.18488	-0.093406	0.73311
Scn1a	A2APX8	0.0208877	0.0825953	1.68011	Scn1a	0.548043	0.021615	0.261185		0.119168	-0.0750544	0.923839		0.0161727	-0.11275	1.79122	Scn1a	0.0766955	-0.109987	1.11523
Scn1b	P97952	0.591503	-0.0159882	0.228043		0.319065	0.0283907	0.496121		0.758681	-0.00910632	0.119941		0.194179	0.0421894	0.711798		0.95071	0.00186088	0.0219521
Scn2a	B1AWN6	0.951147	-0.00127457	0.0217523		0.741765	0.0110791	0.129733		0.65514	-0.0149671	0.183666		0.422414	-0.0298388	0.374262		0.0282291	-0.0627795	1.5493	Scn2a
Scn2b	Q56A07	0.0315614	-0.0741873	1.50084	Scn2b	0.623704	-0.0256801	0.205021		0.556523	-0.0282953	0.254517		0.156821	0.0700579	0.804596		0.0358224	-0.0812194	1.44585	Scn2b
Scn3a	A2ASI5	0.939611	-0.00401941	0.027052		0.488214	-0.0418216	0.311389		0.448184	-0.0607414	0.348543		0.580252	-0.0251178	0.236383		0.5685	-0.0588986	0.245269
Scn3b	H3BJR6	0.0446519	-0.108404	1.35016	Scn3b	0.853383	-0.00888472	0.068856		0.605925	-0.0413633	0.217581		0.0860444	-0.0955919	1.06528		0.101492	-0.153018	0.993568
Scn4b	Q7M729	0.563079	-0.0802402	0.249431		0.846946	0.0491813	0.072144		0.158987	-0.318945	0.798639		0.272632	0.234966	0.564423		0.982966	-0.00472689	0.0074614
Scn7a	Q62467	0.572002	-0.0833777	0.242603		0.0785184	0.230269	1.10503		0.970138	-0.00530141	0.0131664		0.674221	-0.0516214	0.171198		0.867917	-0.0224727	0.0615217
Scn8a	A0A0J9YUW5	0.704864	-0.0099022	0.151894		0.985178	-0.000700205	0.00648513		0.385197	-0.0264104	0.414317		0.574257	0.0223051	0.240894		0.533782	-0.0276283	0.272636

## Sheet: Sheet3
Age	2	3	6	10	14
DEX	10	6	18	12	19
